# Supplementary material
Source: HighWire-hosted journal article supplement (https://bmjopen.bmj.com/content/11/7/e050493)
Supplement: inline-supplementary-material-1 [file inline-supplementary-material-1.pdf]

**Appendix “Role of hypertension in the association of overweight and obesity with diabetes among adults in Bangladesh: a population-based cross-sectional nationally representative survey”**

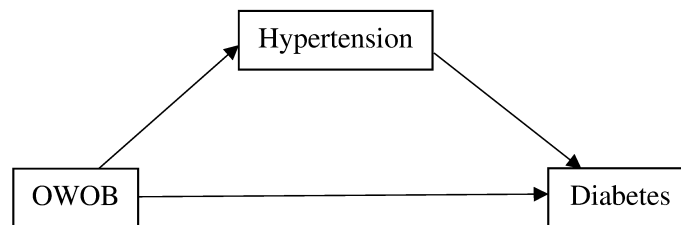

**Figure S1:** Diagram showing the hypothesized relationship of overweight and obesity (OWOB) with diabetes. Here, the hypertension variable is considered as a mediator in the OWOB-diabetes relationship (OWOB → hypertension → diabetes).

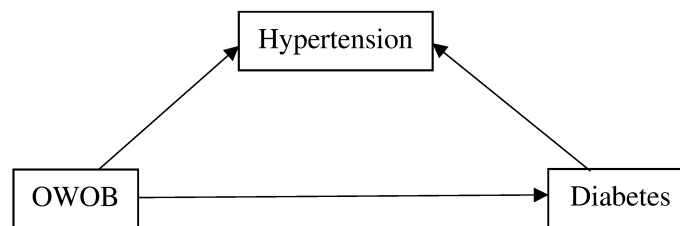

**Figure S2:** Diagram showing the hypothesized relationship of overweight and obesity (OWOB) with diabetes. Here, the hypertension variable is the effect of both OWOB and diabetes and thus considered as a collider in the OWOB-diabetes relationship (OWOB → hypertension ← diabetes).

**Table S1:** Sensitivity analysis of total, direct, and hypertension-mediated <sup>1</sup> effect of OWOB <sup>2</sup> on diabetes in Bangladesh

| Group    | Total effect     | NDE              | NIE              | Mediation effect, % |
|----------|------------------|------------------|------------------|---------------------|
|          | AOR (95% CI)     | AOR (95% CI)     | AOR (95% CI)     |                     |
| Overall  | 1.51 (1.29-1.78) | 1.40 (1.19-1.66) | 1.08 (1.05-1.11) | 18.84               |
| Poor     | 1.71 (1.27-2.38) | 1.63 (1.20-2.28) | 1.05 (0.99-1.11) | 8.38                |
| Non-poor | 1.60 (1.34-1.97) | 1.47 (1.23-1.83) | 1.09 (1.06-1.14) | 19.11               |
| Rural    | 1.56 (1.26-1.90) | 1.44 (1.16-1.76) | 1.08 (1.05-1.12) | 17.18               |
| Urban    | 1.45 (1.10-1.95) | 1.33 (1.00-1.78) | 1.09 (1.04-1.16) | 22.70               |

OWOB: overweight and obesity; AOR: adjusted odds ratio; CI: confidence interval; NDE: natural direct effect; NIE: natural indirect effect;

<sup>1</sup> Individuals with average systolic blood pressure  $\geq 130$  mmHg, or diastolic blood pressure  $\geq 80$  mmHg, or taking antihypertensives were categorized as hypertensive;

<sup>2</sup> The reference was individuals without OWOB.
